# Supplementary material
Source: publisher site journal article supplement (https://www.dovepress.com/article/595422)
Supplement: Supplementary file 1 [file 595422%20Revised%20Supplementary%20Materials.docx]

**Supplemental Materials**

**Supplemental methods**

**Animal study design**

Male DBA/1 mice (5–6 weeks old) were purchased from Jiangsu Jicui Medicine Biotechnology Co., Ltd. All mice were acclimated for 1 week prior to experimentation. Subsequently, the mice were randomly assigned to three groups (n = 5 per group): normal control (Sham), CIA model (CIA+NC) and CIA model with Bmal1 overexpression (CIA+OE-Bmal1). Experimental units were randomly allocated to treatment groups using computer-generated randomization codes. To minimize potential confounding factors, treatment order was counterbalanced through daily rotation of injection sequences. Measurement bias was addressed via blinded assessment. Temporal confounders were mitigated by processing all groups simultaneously within 2 hours. Group allocation awareness was strictly controlled across all experimental stages as follows. During allocation, randomization codes were generated to determine group assignments. During experimental conduct, animal care staff received cage-coded instructions without group identity disclosure. During outcome assessment, technicians performing measurements were fully blinded using cryptic cage labels. Pathologists analyzed tissue samples with masked identifiers. During data analysis, statisticians initially received blinded datasets.

**Bioinformatics analysis**

The gene expression dataset GSE55235 was downloaded from the Gene Expression Omnibus (GEO) database. This dataset was generated using the Affymetrix Human Genome U133A Array platform (GPL96). Raw expression data were processed and normalized using the Robust Multi-array Average (RMA) algorithm. Probe IDs were annotated to gene symbols according to the platform annotation file provided by GEO. When multiple probes corresponded to the same gene symbol, the average expression value was used. Differential expression analysis between RA and control synovial tissues was performed using the limma package in R. P values were adjusted for multiple testing using the Benjamini–Hochberg false discovery rate (FDR) method. Genes with |log2 fold change| > 1 and adjusted p value < 0.05 were considered differentially expressed genes (DEGs). The threshold of |log2FC| > 1 was selected to focus on genes with relatively large and biologically meaningful expression changes, while the adjusted p value controlled the false discovery rate. To estimate immune cell composition in synovial tissues, CIBERSORT was applied using the LM22 signature matrix, with 1000 permutations. Only samples with CIBERSORT output p < 0.05 were considered reliable for downstream analysis. Correlation coefficients (r) and corresponding p values were calculated using Spearman’s method with the cor.test function from the R package stats (version 4.4.2). P values were adjusted for multiple testing using the Benjamini–Hochberg FDR method.

**Supplemental Table 1.** Primers used in this experiment. (h,human; mus,mouse)

| Primer |  |  | Sequence |
| --- | --- | --- | --- |
| hBmal1 |  | Forward | GGAAAAATAGGCCGAATGAT |
|  |  | Reverse | TGAGCCTGGCCTGATAGTAG |
| hβ-actin |  | Forward | CCAACCGCGAGAAGATGA |
|  |  | Reverse | CCAGAGGCGTACAGGGATAG |
| Musβ-actin |  | Forward | CACGATGGAGGGGCCGGACTCATC |
|  |  | Reverse | TAAAGACCTCTATGCCAACACAGT |
| MusBmal1 |  | Forward | GCCACCAACCCATACACAGAAGCAA |
|  |  | Reverse | CCCTCGGTCACATCCTACGACAAAC |
| MusSirt1 |  | Forward | ATCGTTACATATTCCACGGTGCT |
|  |  | Reverse | CACTTTCATCTTCCAAGGGTTCT |
| MusNOS2 |  | Forward | CACCTTGGAGTTCACCCAGT |
|  |  | Reverse | ACCACTCGTACTTGGGATGC |

**Supplementary Table 2.** Antibodies used in this study.

| Experiment | Target | Species | Manufacturer | Catalog |
| --- | --- | --- | --- | --- |
| **Western blotting** | Bmal1 | Mouse | Santa | sc-365645 |
|  | NOS2 | Rabbit | Proteintech | 22226-1-AP |
|  | Sirt1 | Rabbit | Abcam | Ab12193 |
|  | p65 | Rabbit | Cell Signaling Technology | 8242 |
|  | p-p65 | Rabbit | Cell Signaling Technology | 3033 |
|  | β-actin | Mouse | Affinity | T0022 |
|  | HRP-Anti-Mouse IgG | Goat | Proteintech | SA00001-1 |
| **Immunofluorescence staining** | F4/80 | Mouse | Proteintech | 28463-1-AP |
|  | Bmal1 | Mouse | Santa | sc-365645 |
|  | NOS2 | Rabbit | Proteintech | 22226-1-AP |
|  | CD206 | Mouse | Santa | sc-58986 |
|  | Rabbit IgG | Goat | Boster Biological Technology | BA1105 |
|  | Mouse IgG | Goat | Boster Biological Technology | BA1031 |
| **Flow cytometric analysis** | CD16/CD32 | Mouse | Invitrogen | 14-0161-82 |
|  | CD206 (MMR) | Mouse | BioLegend | 141703 |
|  | CD86 | Mouse | BioLegend | 105005 |
|  | CD86 | Mouse | BioLegend | 105007 |

**Supplementary table 3.** **Clinical and laboratory characteristics in patients with rheumatoid arthritis (RA) and osteoarthritis (OA).**

| Characteristics | RA(n=8) |  | OA（n=10) |
| --- | --- | --- | --- |
| Age (year) | 55.6(41-66） |  | 58.3(53-66） |
| Gender, female/male | 7/1 |  | 8/2 |
| Disease duration(year) | 18.8(5-35） |  | 5.47(0.5-15) |
| Smoking, n (%) | 0 |  | 2（20%) |
| Number of tender joints | 10.5（1-18) |  | / |
| Number of swollen joints | 10（1-18) |  | / |
| Laboratory features |  |  |  |
| RF, positive, n (%) | 6（75%) |  | / |
| Anti-CCP, positive, n (%) | 5(100%） |  | / |
| CRP (mg/l) | 21.2(0.9-41.8） |  | 6.28(1.3-14.3） |
| ESR (mm/h) | 41.3（3-75) |  | 13.8(2-27) |
| Disease activity score |  |  |  |
| DAS28-CRP | 4.48(2.05-5.95) |  | / |
| Treatment |  |  |  |
| NSAIDs, n (%) | 6(75%) |  | 9(90%) |
| Methotrexate, n (%) | 5(62.5%) |  | / |
| Leflunomide, n (%) | 4(50%) |  | / |
| Glucocorticoid, n (%) | 2(25%) |  | / |
| Hydroxychloroquine, n (%) | 1(12.5%) |  | / |
| Iguratimod, n (%) | 1(12.5%) |  | / |
| Salazosulfapyridine, n (%) | 1(12.5%) |  | / |

The data shown represent the number (%) or median (range). Anti-CCP, Anti-cyclic citrullinated peptide antibody; CRP, C-reactive protein; DAS28, disease activity score of 28 joints; ESR, erythrocyte sedimentation rate; OA, osteoarthritis; RA, rheumatoid arthritis; RF, rheumatoid factor. Anti-CCP antibody was not detected in 3 RA patients.

**Supplementary table 4. Clinical and laboratory characteristics in patients with rheumatoid arthritis (RA) before and after methotrexate (MTX) treatment for 3 months.**

| Characteristics | RA(n=6) | | |
| --- | --- | --- | --- |
| Before methotrexate | | After methotrexate |
| Number of tender joints | 9.8（2-16) |  | 4.5（1-7) |
| Number of swollen joints | 8.2（2-12) |  | 3.8（1-6) |
| Laboratory features |  |  |  |
| RF, positive, n (%) | 5（83.3%) |  | 5（83.3%) |
| Anti-CCP, positive, n (%) | 5（83.3%) |  | 5（83.3%) |
| CRP (mg/l) | 23.5(10.9-36.3） |  | 12.7(3.2-23） |
| ESR (mm/h) | 37.5（17-53) |  | 23.5(3-43) |
| Disease activity score |  |  |  |
| DAS28-CRP | 4.59(3.1-5.4) |  | 3.53(2.3-4.2) |

The data shown represent the number (%) or median (range). The characteristics of the RA patients (n=6) were as follows: the average age was 54 years (range: 48-62), with a gender distribution of 4 females and 2 males. The average disease duration was 13.3 months (range: 3-25), and none of the patients were smokers. Anti-CCP, Anti-cyclic citrullinated peptide antibody; CRP, C-reactive protein; DAS28, disease activity score of 28 joints; ESR, erythrocyte sedimentation rate; OA, osteoarthritis; RA, rheumatoid arthritis; RF, rheumatoid factor. Anti-CCP antibody was not detected in 1 RA patient.
